# Supplementary material for: Dual ligand co-functionalized fluorescent gold nanoclusters for the “turn on” sensing of glutathione in tumor cells
Source: Royal Society of Chemistry journal article supplement (doi:10.1039/c5tb02195b), 2016-01-01
Supplement: c5tb02195b1.pdf [file c5tb02195b1.pdf]

**Supplementary Information**

**Dual ligand co-functionalized fluorescent gold nanoclusters for “turn on” sensing  
of glutathione in tumor cells**

Shenghao Xu<sup>a</sup>, Teng Gao<sup>a</sup>, Xiuying Feng<sup>a</sup>, Yaning Mao<sup>a</sup>, Pingping Liu<sup>b</sup>, Xijuan Yu<sup>a</sup>, Xiliang Luo<sup>a,\*</sup>

<sup>a</sup>Key Laboratory of Sensor Analysis of Tumor Marker Ministry of Education, College of Chemistry and Molecular Engineering, Qingdao University of Science and Technology, Qingdao 266042, P. R. China

<sup>b</sup>Zhengzhou Tobacco Research Institute, CNTC, Zhengzhou, P. R. China

**\*Corresponding author:**

Prof. Dr. Xiliang Luo, Key Laboratory of Sensor Analysis of Tumor Marker, Ministry of Education, College of Chemistry and Molecular Engineering, Qingdao University of Science and Technology, Qingdao 266042, P. R. China, **E-mail:** xiliangluo@hotmail.com

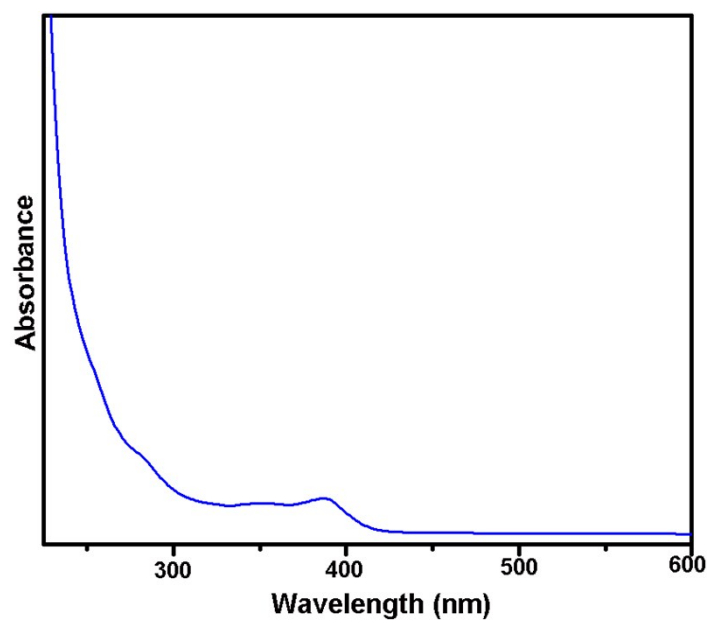

**Fig. S1** Absorption spectra of the prepared dual ligand co-functionalized fluorescent Au NCs.

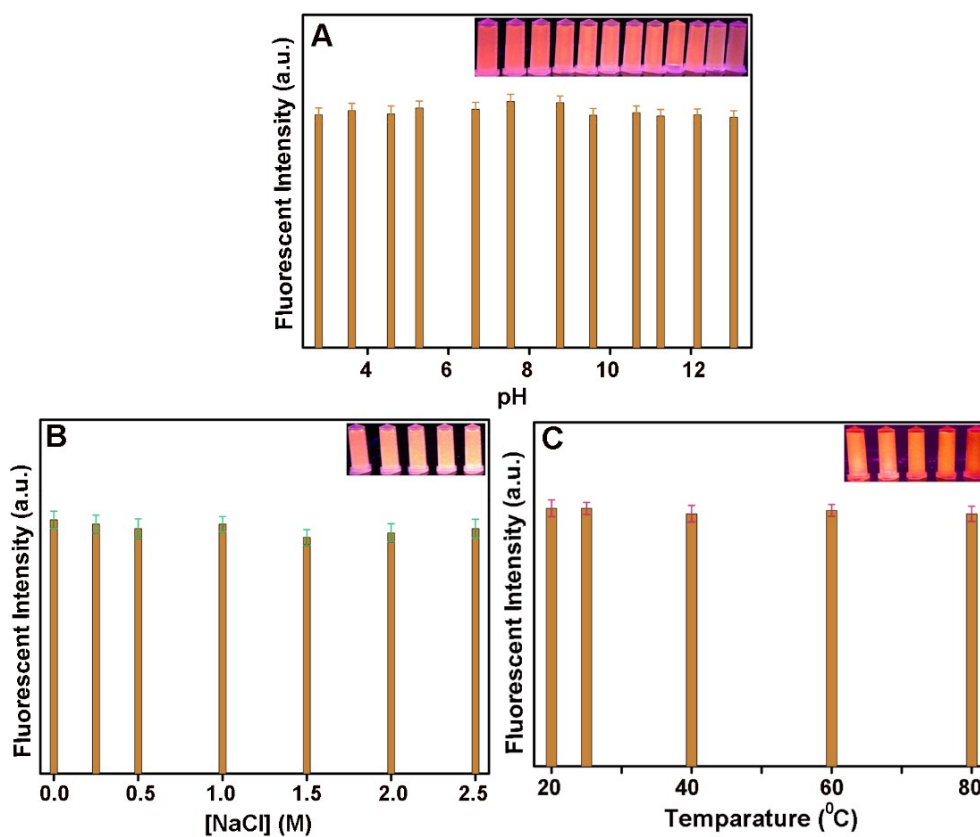

**Fig. S2** The fluorescence stability of as-prepared dual ligand co-functionalized fluorescent Au NCs under (A) various pH values, (B) different concentrations of NaCl, (C) various temperatures.

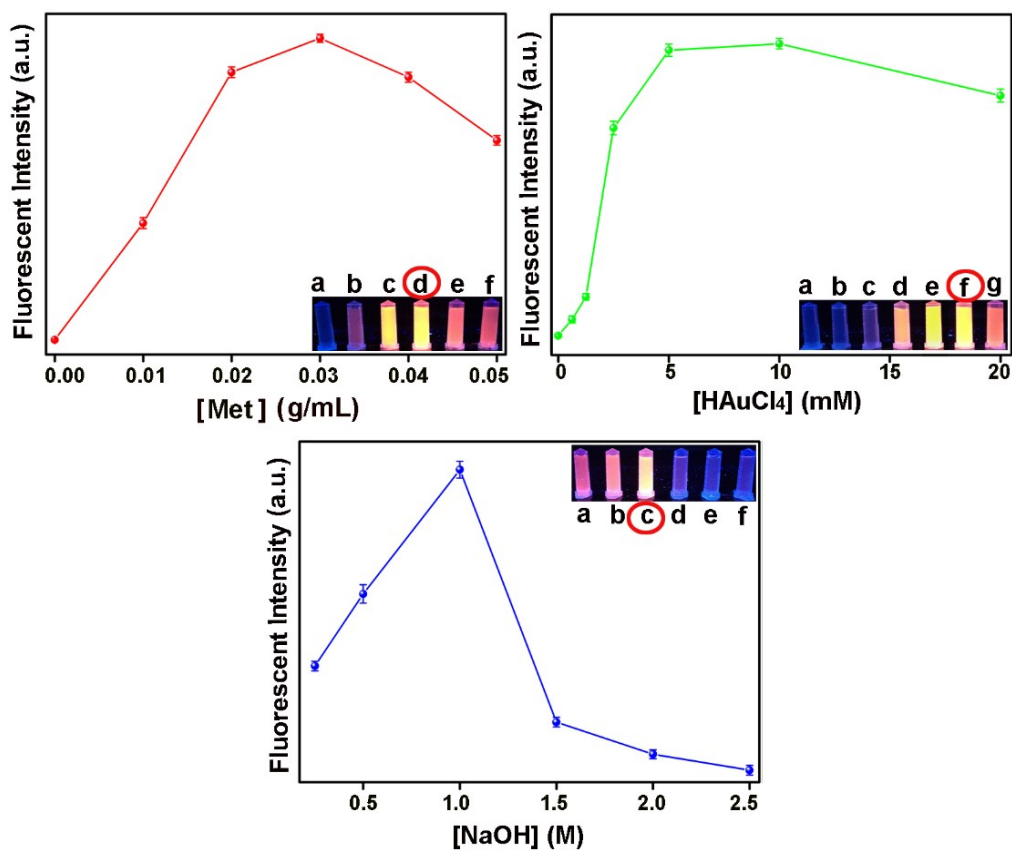

**Fig. S3** Influence of the synthesis conditions: (A) the concentration of Met, (B) HAuCl<sub>4</sub> and (C) NaOH on the fluorescent intensity of the as-prepared dual ligand co-functionalized fluorescent Au NCs.

As shown in Figure S3, an optimal composition of 0.03 g/mL of Met, 10 mM HAuCl<sub>4</sub> and 1.0 M NaOH generates the highest red-orange emission of the Au NCs.
